# Supplementary material
Source: PubMed Central journal article supplement (PMC2804329)
Supplement: supp_M109.021576_jbc.M109.021576-1.pdf [file supp_M109.021576_jbc.M109.021576-1.pdf]

## Supplemental Data

### Supplemental Experimental Procedures

*Constructions of deletion mutants-* The region II of BAEBL was cloned from the pBSV-Fc-BAEBL-8His into the *Bam*HI/*Eco*RI site of pBluescript II KS (+) plasmid. The resultant plasmid, designated pBluescript-BAEBL, was used as a template for the following PCR. The 5' fragment and 3' fragment of BAEBL were amplified by PCR using the primers shown in Table S1, ligated with *Nhe*I or *Pst*I, and cloned into the *Bam*HI/*Eco*RI site of pBSV-Fc-8His vector. The resultant plasmids were designated pBSV-Fc-BAEBL-ΔGAG3-8His, pBSV-Fc-BAEBL-ΔGAG4-8His, and pBSV-Fc-BAEBL-ΔGAG5-8His, respectively. To generate pBSV-Fc-BAEBL-ΔGAG1-8His, QuickChange II Site-Directed Mutagenesis Kit (Stratagene, Cedar Creek, TX) and primers shown in Table S1 was used according to the manufacturers' instructions. The BAEBL containing the desired nucleotide change was cloned into the *Bam*HI/*Eco*RI site of pBSV-Fc-8His.

## Supplemental Tables

**Table S1.** The list of primers used to generate the expression vectors for motif-deleted BAEBLs.

| Expression plasmid           |             | Direction            | Sequence <sup>a</sup>                                        |
|------------------------------|-------------|----------------------|--------------------------------------------------------------|
| pBSV-Fc-BAEBL-<br>ΔGAG1-8His |             | Forward              | 5'-GGATCCCAATATACGTTTATACAGgcAgcTACTgcTTTGT<br>TTGCTTGTGG-3' |
|                              |             | Reverse              | 5'-CCACAAGCAAACAAAgcAGTAgcTgcCTGTATAAACGTA<br>TATTGGGATCC-3' |
| pBSV-Fc-BAEBL-<br>ΔGAG3-8His | 5' fragment | Forward              | 5'-GTAAAACGACGGCCAG-3'                                       |
|                              |             | Reverse <sup>b</sup> | 5'-TTT <u>gCTagc</u> TgcCATAAATGATGTATATGAAGAACATG-3'        |
|                              | 3' fragment | Forward <sup>b</sup> | 5'-AAAgctAGGgcAACACAAATGGAGGTTTTG-3'                         |
|                              |             | Reverse              | 5'-CAGGAAACAGCTATGAC-3'                                      |
| pBSV-Fc-BAEBL-<br>ΔGAG4-8His | 5' fragment | Forward              | 5'-GTAAAACGACGGCCAG-3'                                       |
|                              |             | Reverse <sup>c</sup> | 5'-AC <u>Ctgc</u> AgcTAAAAGATATGTACGTCCAAG-3'                |
|                              | 3' fragment | Forward <sup>c</sup> | 5'-AC <u>Ctgc</u> aGGTgcTGAGGAAGATTATAAGGAAC-3'              |
|                              |             | Reverse              | 5'-CAGGAAACAGCTATGAC-3'                                      |
| pBSV-Fc-BAEBL-<br>ΔGAG5-8His | 5' fragment | Forward              | 5'-GTAAAACGACGGCCAG-3'                                       |
|                              |             | Reverse <sup>c</sup> | 5'-CT <u>CTgc</u> agcTTTCTCACAAAAATCGTCTC-3'                 |
|                              | 3' fragment | Forward <sup>c</sup> | 5'-AA <u>ctgc</u> AGAGgcAATATATTCATTTGAGTCATTTAAGG-3'        |
|                              |             | Reverse              | 5'-CAGGAAACAGCTATGAC-3'                                      |

<sup>a</sup> The mutated nucleotides are in lower case. <sup>b</sup> *NheI* site is underlined. <sup>c</sup> *PstI* site is underlined.

**Table S2.** *K<sub>d</sub>* of the binding of motif-deleted BAEBL with HS.

| Protein name           | <i>K<sub>d</sub></i> (M) <sup>a</sup> | p <sup>b</sup> |
|------------------------|---------------------------------------|----------------|
| BAEBL/Fc               | $8.18 \pm 2.54 \times 10^{-9}$        |                |
| BAEBL $\Delta$ GAG1/Fc | $6.94 \pm 2.57 \times 10^{-9}$        | 0.749          |
| BAEBL $\Delta$ GAG3/Fc | $4.25 \pm 0.15 \times 10^{-9}$        | 0.198          |
| BAEBL $\Delta$ GAG4/Fc | $8.17 \pm 1.97 \times 10^{-9}$        | 0.997          |
| BAEBL $\Delta$ GAG5/Fc | $1.08 \pm 0.84 \times 10^{-8}$        | 0.391          |

<sup>a</sup> Data are shown as mean  $\pm$  standard error of the mean.

<sup>b</sup> Differences between the value of mutant BAEBL and that of wild-type BAEBL were assessed by *t*-test.
